# Supplementary material for: Effects of early intermittent maternal separation on cognitive development of the prefrontal cortex in piglets
Source: Research Square preprint supplement (doi:10.21203/rs.3.rs-2237920/v1), 2022-11-08
Supplement: Supplementary file 1 [file fd4d789c5640ca98b15e4ab4.docx]

**Effects of early intermittent maternal separation on cognitive development of the prefrontal cortex in piglets**

**Zheng Cheng1a · Sitong Zhou1a · Xiaohong Zhanga · Qin Fua · Yue Yanga · Wenbo Jia* · Honggui Liua,b,***

a College of Animal Science and Technology, Northeast Agricultural University, Changjiang Road No. 150030 Harbin, Heilongjiang, P.R. China; b Key Laboratory of Swine Facilities Engineering, Ministry of Agriculture and Rural Affairs, Changjiang Road No. 150030 Harbin, Heilongjiang, P.R. China

* Corresponding author: Honggui Liu. Email: [liuhonggui1312@163.com,](mailto:liuhonggui1312@163.com,) Wenbo Ji. Email: [18845047210@163.com](mailto:18845047210@163.com)

1 represents these authors have equal contribution to this work.

**Author ORCIDs** Zheng Cheng 0000-0002-3410-9456. Sitong Zhou 0000-0003-2519-6065. Wenbo Ji 0000-0001-7803-7880. Honggui Liu 0000-0002-0376-3623.

**Table S1 Gene-specific primers used in qRT-PCR.**

| Gene | Forward Primer (Five’-Three’) | Reverse Primer (Five’-Three’) |
| --- | --- | --- |
| MC4R | GCTGTGGCTGATATGCTGGTGAG | GAAACTCTGTGCGTCCGTGTCC |
| GRP | CTGGGCGGTGGGACACTTAATG | CAGCAAATTCCTTGTGGCATCTTCC |
| CYFIP2 | CACATCCGCTTCATCTCCGAACTC | GGTACTCCTCGTCCGACTTCTGG |
| NMB | GCCTCCTGTTCTTCACTCTGCTC | GCTCCAGACTCTTCTTGCCCATG |
| CPEB1 | CCTGGTCCTTTCTTCTGTCGTGATC | CTGGCATCTCGGTTCTTCTGGTTC |
| ADCYAP1 | AAGAGATGTCGCCCACGGGATC | TCCGAGTCATCTTCCGCTCCTC |
| MAG | ATTGCCATCGTCTGCTACATCACC | GGAAGTCGCTGCTGAACAGGAC |
| PLP1 | GGCTAGGACATCCCGACAAGTTTG | GGAAGGCAATAGACTGGCAAGTGG |
| CPEB4 | TCGGCTAATAACGGTGCTCTGTTG | TGCTGATGCTGGCTGTGATGATG |
| β-actin | GGCACCACACCTTCTACAACGAG | TCATCTTCTCACGGTTGGCTTTGG |
